# Supplementary material for: Facilitators, barriers and impacts to implementing dementia care training for staff in long-term care settings by using fully immersive virtual reality: a scoping review protocol
Source: PubMed Central journal article supplement — BMJ Open. 2024 May 8;14(5):e083724. doi: 10.1136/bmjopen-2023-083724 (PMC11086507; doi:10.1136/bmjopen-2023-083724), 2024-05-08
Supplement: bmjopen-2023-083724.draft_revisions.pdf [file bmjopen-2023-083724.draft_revisions.pdf]

# BMJ Open

BMJ Open is committed to open peer review. As part of this commitment we make the peer review history of every article we publish publicly available.

When an article is published we post the peer reviewers' comments and the authors' responses online. We also post the versions of the paper that were used during peer review. These are the versions that the peer review comments apply to.

The versions of the paper that follow are the versions that were submitted during the peer review process. They are not the versions of record or the final published versions. They should not be cited or distributed as the published version of this manuscript.

BMJ Open is an open access journal and the full, final, typeset and author-corrected version of record of the manuscript is available on our site with no access controls, subscription charges or pay-per-view fees (<http://bmjopen.bmj.com>).

If you have any questions on BMJ Open's open peer review process please email [info.bmjopen@bmj.com](mailto:info.bmjopen@bmj.com)

# BMJ Open

## Facilitators and barriers to implementing dementia care for staff in long-term care settings by using fully immersive virtual reality: a scoping review protocol

|                               |                                                                                                                                                                                                                                                                                                                                     |
|-------------------------------|-------------------------------------------------------------------------------------------------------------------------------------------------------------------------------------------------------------------------------------------------------------------------------------------------------------------------------------|
| Journal:                      | <i>BMJ Open</i>                                                                                                                                                                                                                                                                                                                     |
| Manuscript ID                 | bmjopen-2023-083724                                                                                                                                                                                                                                                                                                                 |
| Article Type:                 | Protocol                                                                                                                                                                                                                                                                                                                            |
| Date Submitted by the Author: | 27-Dec-2023                                                                                                                                                                                                                                                                                                                         |
| Complete List of Authors:     | Hung, Lillian; Vancouver General Hospital, ; Simon Fraser University, Gerontology<br>Zhao, Yong; The University of British Columbia, IDEA Lab<br>Lam, Michelle; The University of British Columbia, IDEA Lab<br>Ren, Haopu; The University of British Columbia, IDEA Lab<br>Wong, Karen Lok Yi; The University of British Columbia, |
| Keywords:                     | Virtual Reality, Literature, Dementia < NEUROLOGY, Caregivers                                                                                                                                                                                                                                                                       |
|                               |                                                                                                                                                                                                                                                                                                                                     |

SCHOLARONE™  
Manuscripts

1  
2  
3 Facilitators and barriers to implementing dementia care for staff in long-term care settings by using  
4 fully immersive virtual reality: a scoping review protocol  
5

6  
7 **AUTHORS**

8  
9 Lillian Hung, Yong Zhao, Michelle Lam, Haopu Ren, Karen Lok Yi Wong  
10

11 1. IDEA Lab, University of British Columbia, Vancouver, British Columbia, Canada  
12

13  
14 **ABSTRACT**

15  
16 **Introduction** The rapid growth of aging population underscores the critical need for dementia care  
17 training among care providers. Innovative Virtual Reality (VR) technology has created opportunities  
18 to improve dementia care training. This scoping review will specifically focus on the barriers,  
19 facilitators and impacts of implementing fully immersive VR training for dementia care among staff  
20 in long-term care (LTC) settings.  
21

22  
23 **Methods and analysis** We will follow the Joanna Briggs Institute's scoping review methodology to  
24 ensure scientific rigor. We will collect literature of all languages from CINAHL, MEDLINE, Scopus,  
25 EMBASE, Web of Science, ProQuest database until December 31 of 2023. Grey literature from  
26 Google Scholar and AgeWell websites will be included. Inclusion criteria encompass papers involving  
27 paid staff (Population), fully immersive VR training (Concept), and long-term care settings (Context).  
28 Literature only referring to non-paid caregivers, or non-fully immersive VR, or other chronic diseases  
29 will be excluded. Literature screening, data extraction, and analysis will be conducted by two  
30 reviewers separately. We will present a narrative summary with charting table on main findings.  
31  
32

33  
34 **Ethics and dissemination:** This work does not require ethics approval, given the public availability of  
35 data for this scoping review. Through a comprehensive overview of the current evidence regarding  
36 barriers and facilitators on this topic, potential insights and practical recommendations will be  
37 generated to support the implementation of VR training to enhance staff competence in LTC  
38 settings. The findings will be presented in a journal article and shared with practitioners in the  
39 frontline.  
40  
41

42  
43 **STRENGTHS AND LIMITATIONS OF THIS STUDY**

- 44  
45  
46  
47  
48  
49  
50  
51  
52  
53  
54  
55  
56  
57  
58  
59  
60
- Comprehensive Exploration - This scoping review will identify the barriers and facilitators to implementing VR training on dementia care in LTC homes. Potential impact of VR training on staff competence and the well-being of residents will be explored.
  - Methodological Rigor - This scoping review will adhere to the Joanna Briggs Institute methodology to ensure scientific rigor and robustness of the review process.
  - Inclusive Approach - The review will encompass a diverse array of articles, including those with varied study designs and languages, providing an inclusive perspective.
  - Exclusion of Informal Caregivers - informal caregivers and students in training will be excluded from this review, potentially limiting the breadth of perspectives.
  - Fully Immersive VR Technology only - While this study's focus on fully immersive VR technology ensures depth in analysis, it may restrict the exploration of other types of VR, potentially overlooking valuable contributions from alternative approaches.

## INTRODUCTION

### Care providers in LTC settings need support

The challenges faced by Long-Term Care (LTC) staff/ formal care providers in managing dementia are significant, particularly due to limited training resources [1,2]. The demand for healthcare workers including nurses, care aides, housekeeping, rehabilitative workers, and doctors, are increasingly in demand as dementia prevalence rises [3]. This growing need of a well-trained workforce in dementia care strains healthcare resources and contributes to caregiver burnout [4-5]. A significant proportion of residents living with dementia in LTC (40-80 %) have cognitive impairment [6]. Furthermore, more than half of people living with dementia show responsive behaviours (aggression due to frustration with their unmet needs), and 82% require assistance with activities of daily living [6]. When combined with inadequate training and self-efficacy, these factors negatively impact staff members' wellbeing. The physical and emotional injuries as well as moral distress associated with dementia care lead to high turnover rates within LTC homes [7]. The quality of life of residents relies on proper dementia care training and effective resident-staff communication [8]. The staff's ability to deliver quality care hinges on good training and communication, with empathy and skill competency, particularly crucial for quality dementia care [9-10]. Effective training strategies to close the gaps between theory and practice is vital [11]. Implementing innovative training programs tailored to the complexities of dementia care is imperative to equip LTC staff with the necessary skills and resilience. Virtual Reality (VR) technology presents a novel solution to these staff training challenges.

### Innovative technology provides opportunities

The origins of Virtual Reality (VR) can be traced back to the 19th century, with significant advancements occurring after major tech companies entered the market in 2014 [12]. VR technology has undergone enormous evolution in recent years, featuring thinner, lighter, and more comfortable designs, clearer resolution, and seamless transition from the real world to the virtual (mixed reality) through intelligent tracking of the eye, hand, and voice. This evolution is exemplified in innovative products like Microsoft HoloLens and Meta Quest [13].

VR's applications in healthcare have expanded, including diagnostics, cognitive training, and caregiver education[14]. The technology's fidelity to real-life experiences is differentiated into non-immersive, semi-immersive, and fully immersive levels, with the latter providing a deeply engaging sense of presence and spatial navigation. Examples of non-immersive equipment may include 2D screens, keyboard, mouse, or joysticks. Semi-immersive images may be shown in larger flat surface displays. A fully immersive experience may involve the use of surrounding projection surfaces or 3D displays like head mounted display (HMD), together with realistic multi-sensorial interaction devices [14]. Fully immersive VR systems develop a sense of presence with enhanced spatial navigation that could not be achieved by non-immersive and semi-immersive set-up [15].

Training programs that utilize VR technology offer risk-free opportunities for care providers to develop proficiency and confidence in their skills [1,16,17]. For example, one experiential dementia training program "myShoes," leveraging fully immersive VR, was reported to improve awareness of the symptoms, and lived experience of people with dementia and increase empathy after simulation [18]. Apart from increased accessibility to dementia care training, VR training is affordable and unrestricted by geographical location, time, or available personnel [1,9,19,20]. VR simulations further provide opportunities for carers to recognize the manners in which dementia impacts daily living and build empathy for the population that they will be caring for [9,21]. Immersion into simulations also allow care providers to gain first-hand experience of how dementia influences their perception of the environment and shapes everyday challenges – ultimately supporting their ability

1  
2  
3 to aid patients with dementia in meaningful ways to improve their quality of life [17,21]. Given the  
4 exponential innovation in VR technology, it is imperative to evaluate systematically how training  
5 programs against health care challenges can capitalize on the advantages offered by these advanced  
6 products.  
7

### 8 **VR training for care providers need to be facilitated**

9 VR training, as an innovative technology aimed at enhancing caregiving competence, has garnered  
10 increased attention from researchers in recent years. A preliminary search reveals several systematic  
11 reviews on VR training for both incumbent and potential caregivers responsible for residents living  
12 with dementia and other chronic diseases. For instance, some reviews focused on VR training  
13 programs for medical, nursing, and health professional students [22–24]. Another systematic review,  
14 which reported that VR could effectively enhance caregiving competence and empathy among  
15 caregivers, encompassed nine studies. Notably, this review included only research related to  
16 informal caregivers and studies focused on various chronic diseases such as dementia, stroke, and  
17 diabetes [25]. Additionally, a systematic review addressing AR/VR-based training, which  
18 demonstrated improvements in knowledge, attitude, and empathy while reducing stigma in people  
19 living with dementia (n=5) and other mental illness (n=11) [26]. When comparing VR technologies, a  
20 particular review found that Head-Mounted Display (HMD) systems were less used in healthcare  
21 training, contrary to more common computer and haptic simulations. The findings revealed that  
22 HMD systems were only deployed by 19% of healthcare training programs, which is lower than the  
23 usage of computer-based simulators (39%) and haptic simulators (42%) [16]. Although recent years  
24 have witnessed an increase in the use of VR nursing training simulations, research utilizing  
25 immersive HMD-based VR technology remains scarce [17].  
26  
27  
28  
29

30  
31 The diversity in equipment and targeted populations may undermine the efficacy of these  
32 systematic reviews, particularly in discerning differences between various devices [16]. Unlike  
33 informal caregivers and students, staff /formal care providers who have face-to-face contact with  
34 residents living with dementia experience more workplace violence and undergo its consequent  
35 emotional and physical tolls [27]. Therefore, it is necessary to understand the barriers to  
36 implementing immersive VR training and how to facilitate its application in LTC homes for frontline  
37 staff. The goal of this review is to examine the barriers, facilitators, and impact of implementing  
38 training programs that leverage advanced fully immersive VR technology for frontline care providers  
39 in LTC settings.  
40  
41  
42

### 43 **REVIEW QUESTION**

- 44 1. What are the barriers and facilitators to introducing a VR training program for care providers  
45 in LTC settings?
- 46 2. What impact does a VR training program have on the staff competence and well-being of  
47 residents in LTC settings?  
48  
49

### 50 **METHODS**

51  
52 The planned scoping review will utilize the JBI methodology [29] The JBI methodology was chosen  
53 due to its comprehensive framework that systematically allows for the inclusion of various study  
54 designs and its emphasis on providing practical evidence for healthcare practice and policy  
55 development, ensuring a robust and transparent approach to synthesizing available literature. The  
56 scoping review is appropriate for our study questions because it enables a broad examination of the  
57 emerging VR field and assess the extent of research activity to inform practice and research.  
58  
59  
60

## **Inclusion criteria**

### **Participants**

This review will include studies that focus on VR training programs for formal care providers (paid employees) in LTC homes, excluding studies related to informal caregivers, such as family and friends, or medical and nursing students. Formal care providers can be defined as trained professionals who deliver medical and health services. This includes nurses, physicians, therapists, and other healthcare workers employed within LTC homes. We will also include LTC residents (with or without chronic conditions such as dementia and other disabilities).

### **Concept**

Our review will consider studies that utilize fully immersive VR technology for training programs, specifically those employing Head-Mounted Display (HMD) systems. We will exclude studies focusing on 2D simulations and virtual environment-based VR programs. The included studies should address barriers and facilitators of VR training program implementation or its impact on care providers' competencies and residents' well-being. Barriers and facilitators will be assessed by leveraging the Consolidated Framework for Implementation Research (CFIR) [28]. CFIR is a framework that evaluates factors influencing implementation success, organized into five domains: innovation, inner setting, outer setting, individuals involved, and the process of implementation. CFIR helps in understanding the complexities of adopting and integrating interventions within organizations. The impact on staff competencies and the well-being of residents will be assessed using the Kirkpatrick Four-Level Training Evaluation Model [22]. The Kirkpatrick Four-Level Training Evaluation Model is a widely used framework for evaluating the effectiveness of training programs. It consists of four levels: reaction, learning, behaviour, and results (specifically, well-being of residents).

### **Context**

Due to the high prevalence of residents living with dementia (69%) in LTC and the impact placed on frontline care providers, we will include studies situated in LTC settings [6]. Other contexts such as assisted living, community, and homes will not be considered in this review.

### **Types of Studies**

This scoping review will encompass a range of study designs, including both experimental and quasi-experimental approaches such as randomized controlled trials, non-randomized controlled trials, before-and-after studies, and interrupted time-series studies. Analytical observational studies, comprising prospective and retrospective cohort studies, case-control studies, and analytical cross-sectional studies, will also be taken into account. Descriptive observational study designs, including case series, individual case reports, and descriptive cross-sectional studies, will be considered for inclusion.

Qualitative studies focusing on qualitative data will be included, employing designs such as phenomenology, grounded theory, ethnography, qualitative description, action research, and feminist research.

Furthermore, systematic reviews meeting the inclusion criteria may be incorporated, depending on the research question. Additionally, text and opinion papers will be considered for inclusion in this scoping review.

### **Search strategy**

The search aims to identify both published and unpublished studies. A preliminary search in CINAHL database was conducted to pinpoint articles related to the topic (refer to Appendix 1). The terms found in article titles and abstracts, along with index terms, will be employed to formulate a comprehensive search strategy for CINAHL, MEDLINE, Scopus, EMBASE, Web of Science, ProQuest

1  
2  
3 database, and the AgeWell website (Canada's technology and aging network) [30]. This search  
4 strategy, encompassing all identified keywords and index terms, will be customized for each  
5 database and information source included. Additionally, the reference lists of all incorporated  
6 evidence sources will be scrutinized for potential supplementary studies. As a scoping review, we are  
7 intentional about including all potential articles. For example, due to the mixed use of informal  
8 caregivers and formal care providers in various research, we will collect articles related to caregivers  
9 and scrutinize them manually at the following screening step.  
10  
11

12 Inclusion criteria encompass studies in any language, with a cut-off date until December 2023.  
13 Unpublished studies and grey literature will be explored through sources such as Google Scholar.  
14 Conference abstracts will be utilized to establish contact with study authors, potentially facilitating  
15 access to full-text studies.  
16  
17  
18

### 19 **Study/Source of Evidence selection**

20 All identified citations will be gathered and uploaded into the Covidence systematic review tool  
21 (Veritas Health Innovation Ltd, AU) [31], with duplicates being removed. Following a pilot test, two  
22 independent reviewers will screen titles and abstracts against the inclusion criteria. Potentially  
23 relevant sources will be retrieved in full, and their citation details will be imported into the  
24 Covidence systematic review tool. Two independent reviewers will thoroughly assess the full text  
25 against the inclusion criteria. Exclusion reasons for sources that do not meet the inclusion criteria at  
26 the full-text stage will be documented and reported in the scoping review. Any reviewer  
27 disagreements will be resolved through group discussion. Outcomes will be comprehensively  
28 reported in the final scoping review and depicted in a Preferred Reporting Items for Systematic  
29 Reviews and Meta-analyses extension for scoping review (PRISMA-ScR) flow diagram [32].  
30  
31  
32  
33

### 34 **Data Extraction**

35 The data will be extracted from articles by two or more independent reviewers. The Garrard Matrix  
36 method will be employed to input data into a designated spreadsheet, encompassing specific  
37 information such as participants, study designs, barriers, facilitators, impacts, and key findings  
38 relevant to the review questions [33]. A draft extraction form is provided (see Appendix 2). Following  
39 the JBI methodology, we will conduct a pilot test of the extraction tool on three full-text articles to  
40 ensure reliability, with results being mapped for consistency. As this scoping review aims to map the  
41 existing literature landscape rather than critically evaluate evidence, we will not assess the study and  
42 methodological quality. The draft spreadsheet will be adjusted and revised as necessary during team  
43 discussions. Any modifications will be documented in the scoping review report. If necessary,  
44 authors of studies will be contacted to request missing or additional data.  
45  
46  
47  
48  
49

### 50 **Data Synthesis**

51 The screening of sources will be depicted in a PRISMA-ScR flow diagram, incorporating exclusion  
52 reasons. Extracted data will be mapped in a literature table and accompanied by a narrative  
53 summary that will connect results to the study objective and research questions. A narrative  
54 mapping summary will accompany the tabulated results, organizing them into themes. Our  
55 comprehensive review will include the presentation of both qualitative and quantitative data.  
56  
57

### 58 **PATIENT AND PUBLIC INVOLVEMENT**



1  
2  
3 One patient partner, Jim Mann, and one family partner, Lily Wong, will be involved in the scoping  
4 review. They have previously collaborated with the first author (LH) in previous a VR study and other  
5 scoping reviews [34–36]. They are older adults and long-term patient and family partners in the UBC  
6 IDEA lab, contributing valuable insights from lived experiences to research and fostering an inclusive  
7 environment to make sure academic research aligns with real-world patient and caregiver needs. In  
8 this scoping review, they will actively participate in the study planning and analysis by contributing  
9 to group discussions. Their experiences regarding barriers, facilitators, and the impact of VR training  
10 for caregivers from the perspectives of patients and families will be shared and communicated to  
11 the entire review group. Team discussions will be scheduled according to their preferred times.  
12 Additionally, they will be invited to staff huddles and meetings for the dissemination of the main  
13 findings. In recognition of their valuable experience and time, they will be provided with gift cards as  
14 compensation and invited to be co-authors of the scoping review report article.  
15  
16  
17

### 18 **ETHICS AND DISSEMINATION**

19  
20 As the data for this scoping review is derived from publicly available articles, research ethics  
21 approval is not deemed necessary. The intention is to submit the scoping review for publication in an  
22 open-access journal. Additionally, a succinct one-page review brief will be disseminated to enhance  
23 accessibility of the findings to a broad audience. This dissemination will involve sharing the results in  
24 staff huddles and meetings with local LTC homes. The overarching goal is to provide evidence-based  
25 guidance for the implementation of VR training programs for care providers in LTC settings.  
26  
27

### 28 **ACKNOWLEDGEMENTS**

29 We acknowledge the kind support of UBC librarian Katherine Miller for guiding and supervising the  
30 entire search process in the preliminary search.  
31  
32

### 33 **CONTRIBUTORS**

34 LH and YZ designed the scoping review, developed the protocol and methodology. LH, ML, YZ, KLYW,  
35 and LR were all involved in preparing the manuscript. All authors have approved the final version of  
36 the submitted protocol.  
37  
38

### 39 **FUNDING**

40  
41 This scoping review is supported by funding from The Canada Research Chair in Senior Care (Grant  
42 number: GR021222).  
43  
44

### 45 **CONFLICTS OF INTEREST**

46  
47 None declared.  
48

### 49 **PATIENT CONSENT FOR PUBLICATION**

50  
51 Not applicable.  
52  
53

### 54 **REFERENCES**

- 55 1 Muirhead K, Macaden L, Smyth K, *et al*. Establishing the effectiveness of technology-enabled  
56 dementia education for health and social care practitioners: a systematic review. *Syst Rev*.  
57 2021;10:1–26.  
58  
59  
60



- 1
  - 2
  - 3
  - 4
  - 5
  - 6
  - 7
  - 8
  - 9
  - 10
  - 11
  - 12
  - 13
  - 14
  - 15
  - 16
  - 17
  - 18
  - 19
  - 20
  - 21
  - 22
  - 23
  - 24
  - 25
  - 26
  - 27
  - 28
  - 29
  - 30
  - 31
  - 32
  - 33
  - 34
  - 35
  - 36
  - 37
  - 38
  - 39
  - 40
  - 41
  - 42
  - 43
  - 44
  - 45
  - 46
  - 47
  - 48
  - 49
  - 50
  - 51
  - 52
  - 53
  - 54
  - 55
  - 56
  - 57
  - 58
  - 59
  - 60
- 2 World Health Organization (WHO). Dementia. 2023. <https://www.who.int/news-room/fact-sheets/detail/dementia> (accessed 22 December 2023)
- 3 Falzarano F, Cimarolli VR, Minahan J, *et al.* Long-Distance Caregivers: What are Their Experiences with Formal Care Providers? *Clin Gerontol.* 2022;45:1273–84.
- 4 Hirt J, Beer T. Use and impact of virtual reality simulation in dementia care education: A scoping review. *Nurse Educ Today.* 2020;84:1–8.
- 5 Woodhead EL, Northrop L, Edelstein B. Stress, Social Support, and Burnout Among Long-Term Care Nursing Staff. *Journal of Applied Gerontology.* 2016;35:84–105.
- 6 Canadian Institute for Health Information (CIHI). Dementia in long-term care. 2023. <https://www.cihi.ca/en/dementia-in-canada/dementia-care-across-the-health-system/dementia-in-long-term-care> (accessed 22 December 2023)
- 7 Shrestha S, Alharbi RJM, While C, *et al.* Self-efficacy of direct care workers providing care to older people in residential aged care settings: a scoping review protocol. *Syst Rev.* 2021;10:1–5.
- 8 Zimmerman S, Sloane PD, Williams CS, *et al.* Dementia Care and Quality of Life in Assisted Living and Nursing Homes. *Gerontologist.* 2005;45:133–46.
- 9 Slater P, Hasson F, Gillen P, *et al.* Virtual simulation training: Imaged experience of dementia. *Int J Older People Nurs.* 2019;14:1–11.
- 10 Hancock GA, Woods B, Challis D, *et al.* The needs of older people with dementia in residential care. *Int J Geriatr Psychiatry.* 2006;21:43–9.
- 11 Bower FL, McCullough CS, Pille BL. Synthesis of Research Findings Regarding Alzheimer’s Disease: Part IV, Education of Family and Staff Caregivers. *Worldviews on Evidence-based Nursing presents the archives of Online Journal of Knowledge Synthesis for Nursing.* 2002;E9:128–41.
- 12 Barnard D. History of VR – Timeline of events and tech development. VirtualSpeech. 2023. <https://virtualspeech.com/blog/history-of-vr> (accessed 22 December 2023)
- 13 CNET Highlights. Meta Quest Pro vs. Microsoft HoloLens 2 (Watch the Reveals). YouTube 2022. <https://www.youtube.com/watch?v=BFqEUHVAAaQI> (accessed 22 December 2023)
- 14 García-Betances RI, Arredondo Waldmeyer MT, Fico G, *et al.* A Succinct Overview of Virtual Reality Technology Use in Alzheimer’s Disease. *Front Aging Neurosci.* 2015;7:1–8.
- 15 Slobounov SM, Ray W, Johnson B, *et al.* Modulation of cortical activity in 2D versus 3D virtual reality environments: An EEG study. *International Journal of Psychophysiology.* 2015;95:254–60.
- 16 Mäkinen H, Haavisto E, Havola S, *et al.* User experiences of virtual reality technologies for healthcare in learning: an integrative review. *Behaviour & Information Technology.* 2022;41:1–17.
- 17 Plotzky C, Lindwedel U, Sorber M, *et al.* Virtual reality simulations in nurse education: A systematic mapping review. *Nurse Educ Today.* 2021;101:1–11.

- 1  
2  
3 18 Adefila A, Graham S, Clouder L, *et al.* myShoes – the future of experiential dementia training? *The Journal of Mental Health Training, Education and Practice*. 2016;11:91–101.
- 4  
5  
6 19 Brown KM, Swoboda SM, Gilbert GE, *et al.* Curricular Integration of Virtual Reality in Nursing  
7 Education. *Journal of Nursing Education*. 2023;62:364–73.
- 8  
9 20 Plotzky C, Lindwedel U, Sorber M, *et al.* Virtual reality simulations in nurse education: A  
10 systematic mapping review. *Nurse Educ Today*. 2021;101:1–11.
- 11  
12 21 Hayhurst J. How Augmented Reality and Virtual Reality is Being Used to Support People Living  
13 with Dementia—Design Challenges and Future Directions. *Augmented Reality and Virtual  
14 Reality*. Springer International Publishing 2018:295–305. [https://doi.org/10.1007/978-3-319-64027-3\\_20](https://doi.org/10.1007/978-3-319-64027-3_20)
- 15  
16  
17 22 Barros Una L, Brangman S, Indelicato A, *et al.* Using second life to teach health professions  
18 students about Alzheimer’s Disease: A comprehensive review. *Gerontol Geriatr Educ*.  
19 2023;44:243–53.
- 20  
21  
22 23 Bauce K, Kaylor MB, Staysniak G, *et al.* Use of theory to guide integration of virtual reality  
23 technology in nursing education: A scoping study. *Journal of Professional Nursing*. 2023;44:1–  
24 7.
- 25  
26 24 Foronda C, Lee J, Santiesteban Z. Use of Virtual Reality in Family Caregiver Education: A  
27 Literature Review. *CIN: Computers, Informatics, Nursing*. 2023;41:125–7.
- 28  
29 25 Wang J, Li Q, Cui J, *et al.* Effectiveness of Virtual Reality on the Caregiving Competence and  
30 Empathy of Caregivers for Elderly with Chronic Diseases: A Systematic Review and Meta-  
31 Analysis. *J Nurs Manag*. 2023;2023:1–15.
- 32  
33 26 Tay JL, Xie H, Sim K. Effectiveness of Augmented and Virtual Reality-Based Interventions in  
34 Improving Knowledge, Attitudes, Empathy and Stigma Regarding People with Mental  
35 Illnesses—A Scoping Review. *J Pers Med*. 2023;13:112.
- 36  
37 27 Jones N, Decker VB, Houston A. De-Escalation Training for Managing Patient Aggression in  
38 High-Incidence Care Areas. *J Psychosoc Nurs Ment Health Serv*. 2023;61:17–24.
- 39  
40 28 Damschroder LJ, Reardon CM, Widerquist MAO, *et al.* The updated Consolidated Framework  
41 for Implementation Research based on user feedback. *Implementation Science*. 2022;17:1–  
42 16.
- 43  
44 29 Peters MDJ, Godfrey C, McInerney P, *et al.* Chapter 11: Scoping reviews. In: Aromataris E,  
45 Munn Z, eds. *JBIM Manual for Evidence Synthesis*. JBI 2020. <https://doi.org/10.46658/JBIMES-20-12>
- 46  
47 30 University Health Network (UHN). About Age-Well. 2023. <https://agewell-nce.ca/about-age-well>  
48 (accessed 23 December 2023)
- 49  
50 31 Covidence. The world’s number 1 systematic review tool. 2023. <https://www.covidence.org/>  
51 (accessed 22 December 2023)
- 52  
53 32 Tricco AC, Lillie E, Zarin W, *et al.* PRISMA Extension for Scoping Reviews (PRISMA-ScR):  
54 Checklist and Explanation. *Ann Intern Med*. 2018;169:467–73.
- 55  
56  
57  
58  
59  
60

- 1  
2  
3 33 Garrard J. CHAPTER 5 Review Matrix Folder: How to Abstract the Research Literature. *Health*  
4 *Sciences Literature Review Made Easy*. Burlington, MA: Jones & Bartlett Learning 2022:120–  
5 38.  
6 [https://search.ebscohost.com/login.aspx?direct=true&AuthType=shib&db=nlebk&AN=26938](https://search.ebscohost.com/login.aspx?direct=true&AuthType=shib&db=nlebk&AN=2693815&site=ehost-live&scope=site&custid=s5672194)  
7 [15&site=ehost-live&scope=site&custid=s5672194](https://search.ebscohost.com/login.aspx?direct=true&AuthType=shib&db=nlebk&AN=2693815&site=ehost-live&scope=site&custid=s5672194) (accessed 23 December 2023)  
8  
9  
10 34 Hung L, Hu G, Wong J, *et al*. Telepresence Robots in Long-Term Care Settings in British  
11 Columbia During the COVID-19 Pandemic: Analyzing the Experiences of Residents and Family  
12 Members. *Gerontol Geriatr Med*. 2023;9:233372142311662.  
13  
14 35 Hung L, Wong KLY, Mann J, *et al*. The Perspective of Nurses and Healthcare Providers on the  
15 use of Television Videos with People with Moderate to Severe Dementia. *Canadian Journal of*  
16 *Nursing Research*. Published Online First: 16 October 2023. doi:  
17 10.1177/08445621231208220  
18  
19 36 Wong KLY, Gregorio M, Mann J, *et al*. Using videos and films with people with major cognitive  
20 disorder living in care settings: A scoping review. *Gerontechnology*. 2023;22:1–13.  
21  
22  
23  
24  
25  
26  
27  
28  
29  
30  
31  
32  
33  
34  
35  
36  
37  
38  
39  
40  
41  
42  
43  
44  
45  
46  
47  
48  
49  
50  
51  
52  
53  
54  
55  
56  
57  
58  
59  
60

## APPENDICES

## Appendix I: Search strategy

CINAHL database

|     |                                                                                                                                                                                                                                                                                                                                                                                                                                                                                                                                                                                  |           |
|-----|----------------------------------------------------------------------------------------------------------------------------------------------------------------------------------------------------------------------------------------------------------------------------------------------------------------------------------------------------------------------------------------------------------------------------------------------------------------------------------------------------------------------------------------------------------------------------------|-----------|
| S14 | S3 AND S6 AND S10 AND S13                                                                                                                                                                                                                                                                                                                                                                                                                                                                                                                                                        | 65        |
| S13 | S11 OR S12                                                                                                                                                                                                                                                                                                                                                                                                                                                                                                                                                                       | 2,576,167 |
| S12 | AB ( Program* OR curricul* OR course* OR educat* OR train* OR teach* OR pedagog* OR learn* OR phenomenograph* OR evaluat* OR haptic* OR touch ) OR TI ( Program* OR curricul* OR course* OR educat* OR train* OR teach* OR pedagog* OR learn* OR phenomenograph* OR evaluat* OR haptic* OR touch )                                                                                                                                                                                                                                                                               | 1,993,274 |
| S11 | (MH "Education+") OR (MH "Learning+")                                                                                                                                                                                                                                                                                                                                                                                                                                                                                                                                            | 1,113,593 |
| S10 | S7 OR S8 OR S9                                                                                                                                                                                                                                                                                                                                                                                                                                                                                                                                                                   | 1,174,639 |
| S9  | TI ( caregiver* OR carer* OR "care giver*" OR nurse* OR "care aide*" OR "personal support worker*" OR "medical staff*" OR "health care worker*" OR "healthcare worker*" OR "health care" OR "health employee*" OR "health* staff" OR "home care" OR "home health*" OR "nursing home" ) OR AB ( caregiver* OR carer* OR "care giver*" OR nurse* OR "care aide*" OR "personal support worker*" OR "medical staff*" OR "health care worker*" OR "healthcare worker*" OR "health care" OR "health employee*" OR "health* staff" OR "home care" OR "home health*" OR "nursing home" ) | 712,338   |
| S8  | (MH "Health Personnel+")                                                                                                                                                                                                                                                                                                                                                                                                                                                                                                                                                         | 646,888   |
| S7  | (MH "Caregivers")                                                                                                                                                                                                                                                                                                                                                                                                                                                                                                                                                                | 44,019    |
| S6  | S4 OR S5                                                                                                                                                                                                                                                                                                                                                                                                                                                                                                                                                                         | 133,852   |
| S5  | AB ( dementia* OR alzheimer* OR "cognit* impair*" OR memor* N2 los* ) OR TI ( dementia* OR alzheimer* OR "cognit* impair*" OR memor* N2 los* )                                                                                                                                                                                                                                                                                                                                                                                                                                   | 116,116   |
| S4  | (MH "Dementia+")                                                                                                                                                                                                                                                                                                                                                                                                                                                                                                                                                                 | 85,002    |
| S3  | S1 OR S2                                                                                                                                                                                                                                                                                                                                                                                                                                                                                                                                                                         | 13,257    |
| S2  | AB ( "virtual realit*" OR vr ) OR TI ( "virtual realit*" OR vr )                                                                                                                                                                                                                                                                                                                                                                                                                                                                                                                 | 8,081     |
| S1  | (MH "Virtual Reality+")                                                                                                                                                                                                                                                                                                                                                                                                                                                                                                                                                          | 8,468     |

1  
2  
3 **Appendix II: Data extraction instrument**

4

---

| Articles<br>(countries) | Participants<br>(Sample size) | Study Designs | Barriers | Facilitators | Impacts | Findings |
|-------------------------|-------------------------------|---------------|----------|--------------|---------|----------|
| Author, year            |                               |               |          |              |         |          |
| Author, year            |                               |               |          |              |         |          |
| Author, year            |                               |               |          |              |         |          |
| Author, year            |                               |               |          |              |         |          |
| Author, year            |                               |               |          |              |         |          |
| .....                   |                               |               |          |              |         |          |

---

5  
6  
7  
8  
9  
10  
11  
12  
13

14  
15  
16  
17  
18  
19  
20  
21  
22  
23  
24  
25  
26  
27  
28  
29  
30  
31  
32  
33  
34  
35  
36  
37  
38  
39  
40  
41  
42  
43  
44  
45  
46  
47  
48  
49  
50  
51  
52  
53  
54  
55  
56  
57  
58  
59  
60

For peer review only

# BMJ Open

## Facilitators, barriers, and impacts to implementing dementia care for staff in long-term care settings by using fully immersive virtual reality: a scoping review protocol

|                                 |                                                                                                                                                                                                                                                                                                                                     |
|---------------------------------|-------------------------------------------------------------------------------------------------------------------------------------------------------------------------------------------------------------------------------------------------------------------------------------------------------------------------------------|
| Journal:                        | <i>BMJ Open</i>                                                                                                                                                                                                                                                                                                                     |
| Manuscript ID                   | bmjopen-2023-083724.R1                                                                                                                                                                                                                                                                                                              |
| Article Type:                   | Protocol                                                                                                                                                                                                                                                                                                                            |
| Date Submitted by the Author:   | 12-Mar-2024                                                                                                                                                                                                                                                                                                                         |
| Complete List of Authors:       | Hung, Lillian; Vancouver General Hospital, ; Simon Fraser University, Gerontology<br>Zhao, Yong; The University of British Columbia, IDEA Lab<br>Lam, Michelle; The University of British Columbia, IDEA Lab<br>Ren, Haopu; The University of British Columbia, IDEA Lab<br>Wong, Karen Lok Yi; The University of British Columbia, |
| <b>Primary Subject Heading</b>: | Nursing                                                                                                                                                                                                                                                                                                                             |
| Secondary Subject Heading:      | Medical education and training                                                                                                                                                                                                                                                                                                      |
| Keywords:                       | Virtual Reality, Literature, Dementia < NEUROLOGY, Caregivers                                                                                                                                                                                                                                                                       |
|                                 |                                                                                                                                                                                                                                                                                                                                     |

SCHOLARONE™  
Manuscripts

1  
2  
3 Facilitators, barriers, and impacts to implementing dementia care for staff in long-term care settings by  
4 using fully immersive virtual reality: a scoping review protocol  
5

## 6 7 **AUTHORS**

8  
9 Lillian Hung, Yong Zhao, Michelle Lam, Haopu Ren, Karen Lok Yi Wong

10  
11 Corresponding author: Lillian Hung

12  
13 lillian.hung@vch.ca  
14  
15  
16  
17

18 1. IDEA Lab, The University of British Columbia, Vancouver, British Columbia, Canada  
19

## 20 21 **ABSTRACT**

22  
23 **Introduction** The rapid growth of the aging population underscores the critical need for dementia  
24 care training among care providers. Innovative Virtual Reality (VR) technology has created  
25 opportunities to improve dementia care training. This scoping review will specifically focus on the  
26 barriers, facilitators and impacts of implementing fully immersive VR training for dementia care  
27 among staff in long-term care (LTC) settings.  
28

29  
30 **Methods and analysis** We will follow the Joanna Briggs Institute's scoping review methodology to  
31 ensure scientific rigor. We will collect literature of all languages with abstracts in English from  
32 CINAHL, MEDLINE, Scopus, EMBASE, Web of Science, and ProQuest database until December 31,  
33 2023. Grey literature from Google Scholar and AgeWell websites will be included. Inclusion criteria  
34 encompass papers involving paid staff (Population), fully immersive VR training on dementia care  
35 (Concept), and long-term care settings (Context). Literature referring only to non-paid caregivers,  
36 non-fully immersive VR, or other chronic diseases will be excluded. Literature screening, data  
37 extraction, and analysis will be conducted by two reviewers separately. We will present a narrative  
38 summary with a charting table on the main findings.  
39  
40

41  
42 **Ethics and dissemination:** This work does not require ethics approval, given the public data  
43 availability for this scoping review. Through a comprehensive overview of the current evidence  
44 regarding impacts, barriers and facilitators on this topic, potential insights and practical  
45 recommendations will be generated to support the implementation of VR training to enhance staff  
46 competence in LTC settings. The findings will be presented in a journal article and shared with  
47 practitioners on the frontline.  
48  
49

## 50 51 **STRENGTHS AND LIMITATIONS OF THIS STUDY**

- 52 • Comprehensive Exploration - This scoping review will identify the impacts, barriers, and  
53 facilitators of implementing VR training on dementia care in LTC homes while also exploring  
54 the potential impact of VR training on staff competence and the well-being of residents.
- 55 • Methodological Rigor—This scoping review will adhere to the Joanna Briggs Institute  
56 methodology to ensure the scientific rigor and robustness of the review process.
- 57 • Inclusive Approach - The review will encompass a diverse array of articles, including those  
58 with varied study designs and two languages, providing an inclusive perspective.  
59  
60



- Exclusion of Informal Caregivers - informal caregivers and students in training will be excluded from this review, potentially limiting the breadth of perspectives.
- Fully Immersive VR Technology only - While this study's focus on fully immersive VR technology ensures depth in analysis, it may restrict the exploration of other types of VR, potentially overlooking valuable contributions from alternative approaches.

## INTRODUCTION

### Care providers in LTC settings need support

The challenges faced by Long-Term Care (LTC) staff/ formal care providers in managing dementia are significant, partially due to limited training resources [1,2]. The demand for healthcare workers, including nurses, care aides, housekeeping staff, rehabilitative workers, and doctors, is increasingly urgent as dementia prevalence rises [3]. This growing need for a well-trained workforce in dementia care places pressure on healthcare resources and adds to the burden experienced by caregivers, leading to burnout [4,5]. A significant proportion of residents living with dementia in LTC (40-80 %) experience cognitive impairment [6]. Furthermore, more than half of people living with dementia show responsive behaviours (aggression due to frustration with their unmet needs), and 82% require assistance with activities of daily living [6]. When combined with inadequate training and self-efficacy, these factors negatively impact staff members' well-being. The physical and emotional injuries, as well as moral distress associated with dementia care, lead to high turnover rates within LTC homes [7]. The quality of life of residents relies on proper dementia care training and effective resident-staff communication [8]. The staff's ability to deliver quality care hinges on good training and communication, with empathy and skill competency particularly crucial for quality dementia care [9,10]. Effective training strategies to bridge the gaps between theory and practice are vital [11]. Implementing innovative training programs tailored to the complexities of dementia care is imperative to equip LTC staff with the necessary skills and resilience. Virtual Reality (VR) technology presents a novel solution to these staff training challenges.

### Innovative technology provides opportunities

The origins of VR can be traced back to the 19th century, with significant advancements occurring after major tech companies entered the market in 2014 [12]. VR technology has undergone enormous evolution in recent years, featuring thinner, lighter, and more comfortable designs, more precise resolution, and seamless transition from the real world to the virtual (mixed reality) through intelligent tracking of the eye, hand, and voice. This evolution is exemplified in innovative products like Microsoft HoloLens and Meta Quest [13].

VR's applications in healthcare have expanded, including diagnostics, cognitive training, and caregiver education[14]. The fidelity of the technology to real-life experiences is differentiated into non-immersive, semi-immersive, and fully immersive levels, with the latter providing a deeply engaging sense of presence and spatial navigation. Examples of non-immersive equipment may include 2D screens, keyboards, mice, or joysticks. Semi-immersive images may be shown on larger flat surface displays. A fully immersive experience may involve the use of surrounding projection surfaces or 3D displays like head-mounted displays (HMDs), together with realistic multi-sensorial interaction devices [14]. Fully immersive VR systems develop a sense of presence with enhanced spatial navigation that cannot be achieved by non-immersive and semi-immersive setups [15].

Training programs that utilize VR technology offer risk-free opportunities for care providers to develop proficiency and confidence in their skills [1,16,17]. For example, one experiential dementia training program, "myShoes," leveraging fully immersive VR, was reported to improve awareness of the symptoms and the lived experience of people with dementia and increase empathy after

1  
2  
3 simulation [18]. Apart from increasing accessibility to dementia care training, VR training is  
4 affordable and unrestricted by geographical location, time, or available personnel [1,9,19,20]. VR  
5 simulations further provide opportunities for caregivers to recognize the manners in which dementia  
6 impacts daily living and build empathy for the population that they will be caring for [9,21].  
7 Immersion into simulations also allows care providers to gain firsthand experience of how dementia  
8 influences their perception of the environment and shapes everyday challenges—ultimately  
9 supporting their ability to aid patients with dementia in meaningful ways to improve their quality of  
10 life [17,21]. Given the exponential innovation in VR technology, it is imperative to systematically  
11 evaluate how training programs addressing healthcare challenges can capitalize on the advantages  
12 offered by these advanced products.  
13

### 14 **VR training for care providers needs to be facilitated**

15  
16 VR training, as an innovative technology aimed at enhancing caregiving competence, has garnered  
17 increased attention from researchers in recent years. A preliminary search reveals several systematic  
18 reviews on VR training for both incumbent and potential caregivers responsible for residents living  
19 with dementia and other chronic diseases. For instance, some reviews focused on VR training  
20 programs for medical, nursing, and health professional students [22–24]. Another systematic review,  
21 which reported that VR could effectively enhance caregiving competence and empathy among  
22 caregivers, encompassed nine studies. Notably, this review included only research related to  
23 informal caregivers and studies focused on various chronic diseases such as dementia, stroke, and  
24 diabetes [25]. Additionally, a systematic review addressing AR/VR-based training demonstrated  
25 improvements in knowledge, attitudes, and empathy of diverse healthcare professionals, alongside a  
26 reduction in stigma towards individuals with various mental health conditions, although only a  
27 minority of studies (5 out of 11) specifically addressed dementia [[26]. When comparing VR  
28 technologies, a particular review found that Head-Mounted Display (HMD) systems were less used in  
29 healthcare training, contrary to more common computer and haptic simulations. The findings  
30 revealed that HMD systems were only deployed by 19% of healthcare training programs, which is  
31 lower than the usage of computer-based simulators (39%) and haptic simulators (42%) [[16].  
32 Although recent years have witnessed an increase in the use of VR nursing training simulations,  
33 research utilizing immersive HMD-based VR technology remains scarce [17].  
34  
35  
36  
37  
38

39  
40 The diversity in equipment and targeted populations may undermine the efficacy of these  
41 systematic reviews, particularly in discerning differences between various devices [16]. Unlike  
42 informal caregivers and students, staff /formal care providers who have face-to-face contact with  
43 residents living with dementia experience more workplace violence and undergo consequent  
44 emotional and physical tolls [27]. Therefore, it is necessary to understand the barriers to  
45 implementing immersive VR training and how to facilitate its application in LTC homes for frontline  
46 staff. Scoping reviews are commonly employed in emerging fields with limited research literature  
47 available, aiming to outline a research topic's volume, nature, and characteristics without evaluating  
48 the quality of evidence [28]. Given the nascent stage of this particular field and the scarcity of  
49 published research, a scoping review was deemed suitable as a framework. This review aims to  
50 examine the barriers, facilitators, and impacts of implementing training programs that leverage  
51 advanced, fully immersive VR technology for frontline care providers in LTC settings.  
52  
53

### 54 **REVIEW QUESTION**

- 55 1. What are the barriers and facilitators to introducing a VR training program for dementia care  
56 among care providers in LTC settings?
- 57 2. What impacts does a VR training program for dementia care have on the staff competence  
58 and well-being of residents in LTC settings?  
59  
60

## METHODS

### Design

The planned scoping review will utilize the JBI methodology [29]. The JBI methodology was chosen due to its comprehensive framework that systematically allows for the inclusion of various study designs and its emphasis on providing practical evidence for healthcare practice and policy development, ensuring a robust and transparent approach to synthesizing available literature. The scoping review is appropriate for our study questions because it enables a broad examination of the emerging VR field and assesses the extent of research activity to inform practice and research.

### Inclusion criteria

#### Participants

This review will include studies focusing on VR training programs for formal care providers (paid employees) in LTC homes, targeting care for residents with dementia exclusively, excluding studies related to informal caregivers, such as family and friends, or medical and nursing students. Formal care providers can be defined as trained professionals who deliver medical and health services. This includes nurses, physicians, therapists, and other healthcare workers employed within LTC homes.

#### Concept

Our review will consider studies that utilize fully immersive VR technology for training programs on dementia care, specifically those employing Head-Mounted Display (HMD) systems. We will exclude studies focusing on 2D simulations and virtual environment-based VR programs. The included studies should address barriers and facilitators of VR training program implementation or its impacts on care providers' competencies and residents' well-being. Barriers and facilitators will be assessed by leveraging the Consolidated Framework for Implementation Research (CFIR) [30]. CFIR is a framework that evaluates factors influencing implementation success, organized into five domains: innovation, inner setting, outer setting, individuals involved, and the process of implementation. CFIR helps in understanding the complexities of adopting and integrating interventions within organizations. The impact on staff competencies and/or the well-being of residents will be assessed using the Kirkpatrick Four-Level Training Evaluation Model [[22]. The Kirkpatrick Four-Level Training Evaluation Model is a widely used framework for evaluating the effectiveness of training programs. It consists of four levels: reaction, learning, behaviour, and results (specifically, well-being of residents).

#### Context

Due to the high prevalence of residents living with dementia (69%) in LTC and the impacts placed on frontline care providers, we will include studies situated in LTC settings [6]. We adopted the Canadian Institute for Health Information's (CIHI) definition of long-term care (LTC) homes, "also called nursing homes, continuing care facilities and residential care homes, which provide a wide range of health and personal care services for Canadians with medical and physical needs who require access to 24-hour nursing care, personal care and other therapeutic and support services." [31] Other contexts, such as assisted living, community, and homes, will not be considered in this review.

#### Types of Studies

This scoping review will encompass a range of study designs, including experimental and quasi-experimental approaches, such as randomized controlled trials, non-randomized controlled trials, before-and-after studies, and interrupted time-series studies. Analytical observational studies, comprising prospective and retrospective cohort studies, case-control studies, and analytical cross-sectional studies, will also be taken into account. Descriptive observational study designs, including

1  
2  
3 case series, individual case reports, and descriptive cross-sectional studies, will be considered for  
4 inclusion.  
5

6 Qualitative studies focusing on qualitative data will be included, employing designs such as  
7 phenomenology, grounded theory, ethnography, qualitative description, action research, and  
8 feminist research.  
9

10 Furthermore, systematic reviews meeting the inclusion criteria may be incorporated, depending on  
11 the research question. Additionally, text and opinion papers will be considered for inclusion in this  
12 scoping review.  
13  
14

### 15 **Search strategy**

16 The search aims to identify both published and unpublished studies. A preliminary search in the  
17 CINAHL database was conducted to pinpoint articles related to the topic (refer to Appendix 1). The  
18 terms found in article titles and abstracts, along with index terms, were employed to formulate a  
19 comprehensive search strategy for English-based search engines, including CINAHL, MEDLINE,  
20 Scopus, EMBASE, Web of Science, ProQuest database, and the AgeWell website (Canada's  
21 technology and aging network) [32]. This search strategy, encompassing all identified keywords and  
22 index terms, will be customized for each database and information source included. Additionally, the  
23 reference lists of all incorporated evidence sources will be scrutinized for potential supplementary  
24 studies. As a scoping review, we are intentional about including all potential articles. For example,  
25 due to the mixed-use of informal caregivers and formal care providers in various research, we will  
26 collect articles related to caregivers and scrutinize them manually at the following screening step.  
27  
28  
29

30 Inclusion criteria encompass studies in any language with abstracts in English, with a cut-off date of  
31 December 2023. Only full-text articles in English and Chinese will undergo full-text screening due to  
32 the language proficiency of the team members. Unpublished studies and grey literature will be  
33 explored through Google Scholar. Conference abstracts will be utilized to establish contact with  
34 study authors, potentially facilitating access to full-text studies.  
35  
36  
37

### 38 **Study/Source of Evidence Selection**

39 All identified citations will be gathered and uploaded into the Covidence systematic review tool  
40 (Veritas Health Innovation Ltd, AU) [[33], with duplicates being removed. Following a pilot test in  
41 which the review team was assessed to ensure the consistency of evidence selection, two  
42 independent reviewers will screen titles and abstracts against the inclusion criteria. Potentially  
43 relevant sources will be retrieved in full, and their citation details will be imported into the  
44 Covidence systematic review tool. Two independent reviewers will thoroughly assess the full text  
45 against the inclusion criteria. Exclusion reasons for sources that do not meet the inclusion criteria at  
46 the full-text stage will be documented and reported in the scoping review. Any reviewer  
47 disagreements will be resolved through group discussion. Outcomes will be comprehensively  
48 reported in the final scoping review and depicted in a Preferred Reporting Items for Systematic  
49 Reviews and Meta-analyses extension for scoping review (PRISMA-ScR) flow diagram [34].  
50  
51  
52  
53  
54  
55  
56  
57  
58  
59  
60

### **Data Extraction**

The data will be extracted from articles by two independent reviewers. The Garrard Matrix method will be employed to input data into a designated spreadsheet, encompassing specific information such as participants, study designs, barriers, facilitators, impacts, and key findings relevant to the review questions [35]. A draft extraction form is provided (see Appendix 2). Following the JBI methodology, we will conduct a pilot test of the extraction tool on three full-text articles to ensure reliability, with results being mapped for consistency. As this scoping review aims to map the existing literature landscape rather than critically evaluate evidence, we will not assess the study and methodological quality. The draft spreadsheet will be adjusted and revised as necessary during team discussions. Any modifications will be documented in the scoping review report. If necessary, authors of studies will be contacted to request missing or additional data.

### **Data Synthesis**

Extracted data will be mapped in a literature table and accompanied by a narrative summary that will connect results to the study objective and research questions. A narrative mapping summary will accompany the tabulated results, organizing them into themes. Our comprehensive review will include the presentation of both qualitative and quantitative data.

### **PATIENT AND PUBLIC INVOLVEMENT**

One patient partner, Jim Mann, and one family partner, Lily Wong, were involved in the conception and planning of the scoping review and will be engaged in the data analysis stage of the scoping review. They have previously collaborated with the first author (LH) in a previous VR study and other scoping reviews [36–38]. They are older adults and long-term patient and family partners in the UBC IDEA lab, contributing valuable insights from lived experiences to research and fostering an inclusive environment to make sure academic research aligns with real-world patient and caregiver needs. In this scoping review, they will actively participate in the study planning and analysis by contributing to group discussions. Their experiences regarding barriers, facilitators, and impacts of VR training for caregivers from the perspectives of patients and families will be shared and communicated to the entire review group. Team discussions will be scheduled according to their preferred times. Additionally, they will be invited to staff huddles and meetings for the dissemination of the main findings. In recognition of their valuable experience and time, they will be provided with gift cards as compensation and invited to be co-authors of the scoping review report article.

### **ETHICS AND DISSEMINATION**

As the data for this scoping review is derived from publicly available articles, research ethics approval is not deemed necessary. The intention is to submit the scoping review for publication in an open-access journal. Additionally, a succinct one-page review brief will be disseminated to enhance accessibility of the findings to a broad audience. This dissemination will involve sharing the results in staff huddles and meetings with local LTC homes. The overarching goal is to provide evidence-based guidance for the implementation of VR training programs for care providers in LTC settings.

### **ACKNOWLEDGEMENTS**

We acknowledge the kind support of UBC librarian Katherine Miller for guiding and supervising the entire search process in the preliminary search.

## CONTRIBUTORS

LH and YZ designed the scoping review and developed the protocol and methodology. LH, ML, YZ, KLYW, and LR were all involved in preparing the manuscript. All authors have approved the final version of the submitted protocol.

## FUNDING

This scoping review is supported by funding from The Canada Research Chair in Senior Care (Grant number: GR021222).

## CONFLICTS OF INTEREST

None declared.

## PATIENT CONSENT FOR PUBLICATION

Not applicable.

## REFERENCES

- 1 Muirhead K, Macaden L, Smyth K, *et al.* Establishing the effectiveness of technology-enabled dementia education for health and social care practitioners: a systematic review. *Syst Rev.* 2021;10:1–26.
- 2 World Health Organization (WHO). Dementia. 2023. <https://www.who.int/news-room/fact-sheets/detail/dementia> (accessed 22 December 2023)
- 3 Falzarano F, Cimarolli VR, Minahan J, *et al.* Long-Distance Caregivers: What are Their Experiences with Formal Care Providers? *Clin Gerontol.* 2022;45:1273–84.
- 4 Hirt J, Beer T. Use and impact of virtual reality simulation in dementia care education: A scoping review. *Nurse Educ Today.* 2020;84:1–8.
- 5 Woodhead EL, Northrop L, Edelstein B. Stress, Social Support, and Burnout Among Long-Term Care Nursing Staff. *Journal of Applied Gerontology.* 2016;35:84–105.
- 6 Canadian Institute for Health Information (CIHI). Dementia in long-term care. 2023. <https://www.cihi.ca/en/dementia-in-canada/dementia-care-across-the-health-system/dementia-in-long-term-care> (accessed 22 December 2023)
- 7 Shrestha S, Alharbi RJM, While C, *et al.* Self-efficacy of direct care workers providing care to older people in residential aged care settings: a scoping review protocol. *Syst Rev.* 2021;10:1–5.
- 8 Zimmerman S, Sloane PD, Williams CS, *et al.* Dementia Care and Quality of Life in Assisted Living and Nursing Homes. *Gerontologist.* 2005;45:133–46.
- 9 Slater P, Hasson F, Gillen P, *et al.* Virtual simulation training: Imaged experience of dementia. *Int J Older People Nurs.* 2019;14:1–11.
- 10 Hancock GA, Woods B, Challis D, *et al.* The needs of older people with dementia in residential care. *Int J Geriatr Psychiatry.* 2006;21:43–9.



- 1  
2  
3 11 Bower FL, McCullough CS, Pille BL. Synthesis of Research Findings Regarding Alzheimer's  
4 Disease: Part IV, Education of Family and Staff Caregivers. *Worldviews on Evidence-based*  
5 *Nursing presents the archives of Online Journal of Knowledge Synthesis for Nursing.*  
6 2002;E9:128–41.  
7  
8  
9 12 Barnard D. History of VR – Timeline of events and tech development. VirtualSpeech. 2023.  
10 <https://virtualspeech.com/blog/history-of-vr> (accessed 22 December 2023)  
11  
12 13 CNET Highlights. Meta Quest Pro vs. Microsoft HoloLens 2 (Watch the Reveals). YouTube  
13 2022. <https://www.youtube.com/watch?v=BFqEUHVAAQI> (accessed 22 December 2023)  
14  
15 14 García-Betances RI, Arredondo Waldmeyer MT, Fico G, *et al.* A Succinct Overview of Virtual  
16 Reality Technology Use in Alzheimer's Disease. *Front Aging Neurosci.* 2015;7:1–8.  
17  
18 15 Slobounov SM, Ray W, Johnson B, *et al.* Modulation of cortical activity in 2D versus 3D virtual  
19 reality environments: An EEG study. *International Journal of Psychophysiology.* 2015;95:254–  
20 60.  
21  
22 16 Mäkinen H, Haavisto E, Havola S, *et al.* User experiences of virtual reality technologies for  
23 healthcare in learning: an integrative review. *Behaviour & Information Technology.*  
24 2022;41:1–17.  
25  
26 17 Plotzky C, Lindwedel U, Sorber M, *et al.* Virtual reality simulations in nurse education: A  
27 systematic mapping review. *Nurse Educ Today.* 2021;101:1–11.  
28  
29 18 Adefila A, Graham S, Clouder L, *et al.* myShoes – the future of experiential dementia training?  
30 *The Journal of Mental Health Training, Education and Practice.* 2016;11:91–101.  
31  
32 19 Brown KM, Swoboda SM, Gilbert GE, *et al.* Curricular Integration of Virtual Reality in Nursing  
33 Education. *Journal of Nursing Education.* 2023;62:364–73.  
34  
35 20 Plotzky C, Lindwedel U, Sorber M, *et al.* Virtual reality simulations in nurse education: A  
36 systematic mapping review. *Nurse Educ Today.* 2021;101:1–11.  
37  
38 21 Hayhurst J. How Augmented Reality and Virtual Reality is Being Used to Support People Living  
39 with Dementia—Design Challenges and Future Directions. *Augmented Reality and Virtual*  
40 *Reality.* Springer International Publishing 2018:295–305. [https://doi.org/10.1007/978-3-319-](https://doi.org/10.1007/978-3-319-64027-3_20)  
41 [64027-3\\_20](https://doi.org/10.1007/978-3-319-64027-3_20)  
42  
43 22 Barros Una L, Brangman S, Indelicato A, *et al.* Using second life to teach health professions  
44 students about Alzheimer's Disease: A comprehensive review. *Gerontol Geriatr Educ.*  
45 2023;44:243–53.  
46  
47 23 Bauce K, Kaylor MB, Staysniak G, *et al.* Use of theory to guide integration of virtual reality  
48 technology in nursing education: A scoping study. *Journal of Professional Nursing.* 2023;44:1–  
49 7.  
50  
51 24 Foronda C, Lee J, Santiesteban Z. Use of Virtual Reality in Family Caregiver Education: A  
52 Literature Review. *CIN: Computers, Informatics, Nursing.* 2023;41:125–7.  
53  
54 25 Wang J, Li Q, Cui J, *et al.* Effectiveness of Virtual Reality on the Caregiving Competence and  
55 Empathy of Caregivers for Elderly with Chronic Diseases: A Systematic Review and Meta-  
56 Analysis. *J Nurs Manag.* 2023;2023:1–15.  
57  
58  
59  
60



- 1  
2  
3 26 Tay JL, Xie H, Sim K. Effectiveness of Augmented and Virtual Reality-Based Interventions in  
4 Improving Knowledge, Attitudes, Empathy and Stigma Regarding People with Mental  
5 Illnesses—A Scoping Review. *J Pers Med*. 2023;13:112.  
6  
7 27 Jones N, Decker VB, Houston A. De-Escalation Training for Managing Patient Aggression in  
8 High-Incidence Care Areas. *J Psychosoc Nurs Ment Health Serv*. 2023;61:17–24.  
9  
10 28 Pham MT, Rajić A, Greig JD, *et al*. A scoping review of scoping reviews: advancing the  
11 approach and enhancing the consistency. *Res Synth Methods*. 2014;5:371–85.  
12  
13 29 Peters MDJ, Godfrey C, Mclnerney P, *et al*. Chapter 11: Scoping reviews. In: Aromataris E,  
14 Munn Z, eds. *JBIM Manual for Evidence Synthesis*. JBI 2020. [https://doi.org/10.46658/JBIMES-](https://doi.org/10.46658/JBIMES-20-12)  
15 20-12  
16  
17 30 Damschroder LJ, Reardon CM, Widerquist MAO, *et al*. The updated Consolidated Framework  
18 for Implementation Research based on user feedback. *Implementation Science*. 2022;17:1–  
19 16.  
20  
21 31 Canadian Institute for Health Information. Long-term care homes in Canada: How many and  
22 who owns them? 2021. [https://www.cihi.ca/en/long-term-care-homes-in-canada-how-many-](https://www.cihi.ca/en/long-term-care-homes-in-canada-how-many-and-who-owns-them)  
23 and-who-owns-them (accessed 8 March 2024)  
24  
25 32 University Health Network (UHN). About Age-Well. 2023. [https://agewell-nce.ca/about-age-](https://agewell-nce.ca/about-age-well)  
26 well (accessed 23 December 2023)  
27  
28 33 Covidence. The world's number 1 systematic review tool. 2023. <https://www.covidence.org/>  
29 (accessed 22 December 2023)  
30  
31 34 Tricco AC, Lillie E, Zarin W, *et al*. PRISMA Extension for Scoping Reviews (PRISMA-ScR):  
32 Checklist and Explanation. *Ann Intern Med*. 2018;169:467–73.  
33  
34 35 Garrard J. CHAPTER 5 Review Matrix Folder: How to Abstract the Research Literature. *Health*  
36 *Sciences Literature Review Made Easy*. Burlington, MA: Jones & Bartlett Learning 2022:120–  
37 38.  
38  
39 [https://search.ebscohost.com/login.aspx?direct=true&AuthType=shib&db=nlebk&AN=26938](https://search.ebscohost.com/login.aspx?direct=true&AuthType=shib&db=nlebk&AN=2693815&site=ehost-live&scope=site&custid=s5672194)  
40 15&site=ehost-live&scope=site&custid=s5672194 (accessed 23 December 2023)  
41  
42 36 Hung L, Hu G, Wong J, *et al*. Telepresence Robots in Long-Term Care Settings in British  
43 Columbia During the COVID-19 Pandemic: Analyzing the Experiences of Residents and Family  
44 Members. *Gerontol Geriatr Med*. 2023;9:233372142311662.  
45  
46 37 Hung L, Wong KLY, Mann J, *et al*. The Perspective of Nurses and Healthcare Providers on the  
47 use of Television Videos with People with Moderate to Severe Dementia. *Canadian Journal of*  
48 *Nursing Research*. Published Online First: 16 October 2023. doi:  
49 10.1177/08445621231208220  
50  
51 38 Wong KLY, Gregorio M, Mann J, *et al*. Using videos and films with people with major cognitive  
52 disorder living in care settings: A scoping review. *Gerontechnology*. 2023;22:1–13.  
53  
54  
55  
56  
57  
58  
59  
60

## APPENDICES

## Appendix I: Search strategy

CINAHL database

|     |                                                                                                                                                                                                                                                                                                                                                                                                                                                                                                                                                                                  |
|-----|----------------------------------------------------------------------------------------------------------------------------------------------------------------------------------------------------------------------------------------------------------------------------------------------------------------------------------------------------------------------------------------------------------------------------------------------------------------------------------------------------------------------------------------------------------------------------------|
| S14 | S3 AND S6 AND S10 AND S13                                                                                                                                                                                                                                                                                                                                                                                                                                                                                                                                                        |
| S13 | S11 OR S12                                                                                                                                                                                                                                                                                                                                                                                                                                                                                                                                                                       |
| S12 | AB ( Program* OR curricul* OR course* OR educat* OR train* OR teach* OR pedagog* OR learn* OR phenomenograph* OR evaluat* OR haptic* OR touch ) OR TI ( Program* OR curricul* OR course* OR educat* OR train* OR teach* OR pedagog* OR learn* OR phenomenograph* OR evaluat* OR haptic* OR touch )                                                                                                                                                                                                                                                                               |
| S11 | (MH "Education+") OR (MH "Learning+")                                                                                                                                                                                                                                                                                                                                                                                                                                                                                                                                            |
| S10 | S7 OR S8 OR S9                                                                                                                                                                                                                                                                                                                                                                                                                                                                                                                                                                   |
| S9  | TI ( caregiver* OR carer* OR "care giver*" OR nurse* OR "care aide*" OR "personal support worker*" OR "medical staff*" OR "health care worker*" OR "healthcare worker*" OR "health care" OR "health employee*" OR "health* staff" OR "home care" OR "home health*" OR "nursing home" ) OR AB ( caregiver* OR carer* OR "care giver*" OR nurse* OR "care aide*" OR "personal support worker*" OR "medical staff*" OR "health care worker*" OR "healthcare worker*" OR "health care" OR "health employee*" OR "health* staff" OR "home care" OR "home health*" OR "nursing home" ) |
| S8  | (MH "Health Personnel+")                                                                                                                                                                                                                                                                                                                                                                                                                                                                                                                                                         |
| S7  | (MH "Caregivers")                                                                                                                                                                                                                                                                                                                                                                                                                                                                                                                                                                |
| S6  | S4 OR S5                                                                                                                                                                                                                                                                                                                                                                                                                                                                                                                                                                         |
| S5  | AB ( dementia* OR alzheimer* OR "cognit* impair*" OR memor* N2 los* ) OR TI ( dementia* OR alzheimer* OR "cognit* impair*" OR memor* N2 los* )                                                                                                                                                                                                                                                                                                                                                                                                                                   |
| S4  | (MH "Dementia+")                                                                                                                                                                                                                                                                                                                                                                                                                                                                                                                                                                 |
| S3  | S1 OR S2                                                                                                                                                                                                                                                                                                                                                                                                                                                                                                                                                                         |
| S2  | AB ( "virtual realit*" OR vr ) OR TI ( "virtual realit*" OR vr )                                                                                                                                                                                                                                                                                                                                                                                                                                                                                                                 |
| S1  | (MH "Virtual Reality+")                                                                                                                                                                                                                                                                                                                                                                                                                                                                                                                                                          |

## MEDLINE database

|     |                                                                                                                                                                                                                                                                                                                                                                                                                                                                                                                                                                                  |
|-----|----------------------------------------------------------------------------------------------------------------------------------------------------------------------------------------------------------------------------------------------------------------------------------------------------------------------------------------------------------------------------------------------------------------------------------------------------------------------------------------------------------------------------------------------------------------------------------|
| S18 | S3 AND S6 AND S13 AND S17                                                                                                                                                                                                                                                                                                                                                                                                                                                                                                                                                        |
| S17 | S14 OR S15 OR S16                                                                                                                                                                                                                                                                                                                                                                                                                                                                                                                                                                |
| S16 | AB ( caregiver* OR carer* OR "care giver*" OR nurse* OR "care aide*" OR "personal support worker*" OR "medical staff*" OR "health care worker*" OR "healthcare worker*" OR "health care" OR "health employee*" OR "health* staff" OR "home care" OR "home health*" OR "nursing home" ) OR TI ( caregiver* OR carer* OR "care giver*" OR nurse* OR "care aide*" OR "personal support worker*" OR "medical staff*" OR "health care worker*" OR "healthcare worker*" OR "health care" OR "health employee*" OR "health* staff" OR "home care" OR "home health*" OR "nursing home" ) |
| S15 | (MH "Health Personnel+")                                                                                                                                                                                                                                                                                                                                                                                                                                                                                                                                                         |
| S14 | (MH "Caregiver Burden")                                                                                                                                                                                                                                                                                                                                                                                                                                                                                                                                                          |
| S13 | S7 OR S8 OR S9 OR S10 OR S11 OR S12                                                                                                                                                                                                                                                                                                                                                                                                                                                                                                                                              |
| S12 | AB ( Program* OR curricul* OR course* OR educat* OR train* OR teach* OR pedagog* OR learn* OR phenomenograph* OR evaluat* OR haptic* OR touch ) OR TI ( Program* OR curricul* OR course* OR educat* OR train* OR teach* OR pedagog* OR learn* OR phenomenograph* OR evaluat* OR haptic* OR touch )                                                                                                                                                                                                                                                                               |
| S11 | (MH "Learning+")                                                                                                                                                                                                                                                                                                                                                                                                                                                                                                                                                                 |
| S10 | (MH "Education+")                                                                                                                                                                                                                                                                                                                                                                                                                                                                                                                                                                |
| S9  | (MH "Program Evaluation+")                                                                                                                                                                                                                                                                                                                                                                                                                                                                                                                                                       |
| S8  | (MH "Program Development")                                                                                                                                                                                                                                                                                                                                                                                                                                                                                                                                                       |
| S7  | (MH "Nursing Research+")                                                                                                                                                                                                                                                                                                                                                                                                                                                                                                                                                         |
| S6  | S4 OR S5                                                                                                                                                                                                                                                                                                                                                                                                                                                                                                                                                                         |
| S5  | AB ( dementia* OR alzheimer* OR "cognit* impair*" OR memor* N2 los* ) OR TI ( dementia* OR alzheimer* OR "cognit* impair*" OR memor* N2 los* )                                                                                                                                                                                                                                                                                                                                                                                                                                   |
| S4  | (MH "Dementia+")                                                                                                                                                                                                                                                                                                                                                                                                                                                                                                                                                                 |
| S3  | S1 OR S2                                                                                                                                                                                                                                                                                                                                                                                                                                                                                                                                                                         |
| S2  | AB ( "virtual realit*" OR vr ) OR TI ( "virtual realit*" OR vr )                                                                                                                                                                                                                                                                                                                                                                                                                                                                                                                 |
| S1  | (MH "Virtual Reality+")                                                                                                                                                                                                                                                                                                                                                                                                                                                                                                                                                          |

## EMBASE database

|    |                                                                                                                                                                                                                                                                                                                                                                                                                                                                   |
|----|-------------------------------------------------------------------------------------------------------------------------------------------------------------------------------------------------------------------------------------------------------------------------------------------------------------------------------------------------------------------------------------------------------------------------------------------------------------------|
| 1  | (dementia or alzheimer* or cognit* impair* or (memor* adj2 los*)).mp. [mp=title, abstract, heading word, drug trade name, original title, device manufacturer, drug manufacturer, device trade name, keyword heading word, floating subheading word, candidate term word]                                                                                                                                                                                         |
| 2  | exp dementia/                                                                                                                                                                                                                                                                                                                                                                                                                                                     |
| 3  | 1 or 2                                                                                                                                                                                                                                                                                                                                                                                                                                                            |
| 4  | exp virtual reality/ or exp virtual reality head mounted display/                                                                                                                                                                                                                                                                                                                                                                                                 |
| 5  | (virtual realit* or vr).mp. [mp=title, abstract, heading word, drug trade name, original title, device manufacturer, drug manufacturer, device trade name, keyword heading word, floating subheading word, candidate term word]                                                                                                                                                                                                                                   |
| 6  | 4 or 5                                                                                                                                                                                                                                                                                                                                                                                                                                                            |
| 7  | exp education/                                                                                                                                                                                                                                                                                                                                                                                                                                                    |
| 8  | exp program development/ or exp program effectiveness/ or exp program efficacy/ or exp program evaluation/                                                                                                                                                                                                                                                                                                                                                        |
| 9  | exp course evaluation/ or exp health care quality/ or exp nursing education/                                                                                                                                                                                                                                                                                                                                                                                      |
| 10 | exp learning/                                                                                                                                                                                                                                                                                                                                                                                                                                                     |
| 11 | (Program* or curricul* or course* or educat* or train* or teach* or pedagog* or learn* or phenomenograph* or lesson* or evaluat* or haptic* or touch).mp. [mp=title, abstract, heading word, drug trade name, original title, device manufacturer, drug manufacturer, device trade name, keyword heading word, floating subheading word, candidate term word]                                                                                                     |
| 12 | 7 or 8 or 9 or 10 or 11                                                                                                                                                                                                                                                                                                                                                                                                                                           |
| 13 | exp caregiver burden/ or exp caregiver burnout/ or exp caregiver/                                                                                                                                                                                                                                                                                                                                                                                                 |
| 14 | exp health care personnel/                                                                                                                                                                                                                                                                                                                                                                                                                                        |
| 15 | (caregiver* or carer* or care giver* or nurse* or care aide* or personal support worker* or medical staff* or health care worker* or healthcare worker* or health care or health employee* or health* staff or home care or home health* or nursing home).mp. [mp=title, abstract, heading word, drug trade name, original title, device manufacturer, drug manufacturer, device trade name, keyword heading word, floating subheading word, candidate term word] |
| 16 | 13 or 14 or 15                                                                                                                                                                                                                                                                                                                                                                                                                                                    |
| 17 | 3 and 6 and 12 and 16                                                                                                                                                                                                                                                                                                                                                                                                                                             |

## Scopus database

TITLE-ABS-KEY ( ( program\* OR curricul\* OR course\* OR educat\* OR train\* OR teach\* OR pedagog\*or AND learn\* ) AND {virtual reality} AND ( dementia\* OR alzheimer\* OR {cognitive impairment} OR {memory loss}) AND ( care\* OR health\* ) )

## Web of Science

("virtual realit\*" OR vr ) AND (dementia\* OR alzheimer\* OR "cognit\* impair\*" OR memor\* N2 los\* ) AND (Program\* OR curricul\* OR course\* OR educat\* OR train\* OR teach\* OR pedagog\* OR learn\* OR phenomenograph\* OR evaluat\* OR haptic\* OR touch) AND (caregiver\* OR carer\* OR "care giver\*" OR nurse\* OR "care aide\*" OR "personal support worker\*" OR "medical staff\*" OR "health care worker\*" OR "healthcare worker\*" OR "health care" OR "health employee\*" OR "health\* staff" OR "home care" OR "home health\*" OR "nursing home")

## ProQuest database

noft("virtual realit\*" OR vr ) AND noft(dementia\* OR alzheimer\* OR "cognit\* impair\*" OR memor\* N2 los\* ) AND noft(Program\* OR curricul\* OR course\* OR educat\* OR train\* OR teach\* OR pedagog\* OR learn\* OR phenomenograph\* OR evaluat\* OR haptic\* OR touch ) AND noft(caregiver\* OR carer\* OR "care giver\*" OR nurse\* OR "care aide\*" OR "personal support worker\*" OR "medical staff\*" OR "health care worker\*" OR "healthcare worker\*" OR "health care" OR "health employee\*" OR "health\* staff" OR "home care" OR "home health\*" OR "nursing home" )

**Appendix II: Data extraction instrument**

| Articles<br>(countries) | Participants<br>(Sample size) | Study Designs | Barriers | Facilitators | Impacts | Findings |
|-------------------------|-------------------------------|---------------|----------|--------------|---------|----------|
| Author, year            |                               |               |          |              |         |          |
| Author, year            |                               |               |          |              |         |          |
| Author, year            |                               |               |          |              |         |          |
| Author, year            |                               |               |          |              |         |          |
| Author, year            |                               |               |          |              |         |          |
| .....                   |                               |               |          |              |         |          |

For peer review only
