# Supplementary material for: Facilitators, barriers and impacts to implementing dementia care training for staff in long-term care settings by using fully immersive virtual reality: a scoping review protocol
Source: PubMed Central journal article supplement — BMJ Open. 2024 May 8;14(5):e083724. doi: 10.1136/bmjopen-2023-083724 (PMC11086507; doi:10.1136/bmjopen-2023-083724), 2024-05-08
Supplement: bmjopen-2023-083724supp001.pdf [file bmjopen-2023-083724supp001.pdf]

**APPENDICES****Appendix I: Search strategy**

CINAHL database

|     |                                                                                                                                                                                                                                                                                                                                                                                                                                                                                                                                                                                  |
|-----|----------------------------------------------------------------------------------------------------------------------------------------------------------------------------------------------------------------------------------------------------------------------------------------------------------------------------------------------------------------------------------------------------------------------------------------------------------------------------------------------------------------------------------------------------------------------------------|
| S14 | S3 AND S6 AND S10 AND S13                                                                                                                                                                                                                                                                                                                                                                                                                                                                                                                                                        |
| S13 | S11 OR S12                                                                                                                                                                                                                                                                                                                                                                                                                                                                                                                                                                       |
| S12 | AB ( Program* OR curricul* OR course* OR educat* OR train* OR teach* OR pedagog* OR learn* OR phenomenograph* OR evaluat* OR haptic* OR touch ) OR TI ( Program* OR curricul* OR course* OR educat* OR train* OR teach* OR pedagog* OR learn* OR phenomenograph* OR evaluat* OR haptic* OR touch )                                                                                                                                                                                                                                                                               |
| S11 | (MH "Education+") OR (MH "Learning+")                                                                                                                                                                                                                                                                                                                                                                                                                                                                                                                                            |
| S10 | S7 OR S8 OR S9                                                                                                                                                                                                                                                                                                                                                                                                                                                                                                                                                                   |
| S9  | TI ( caregiver* OR carer* OR "care giver*" OR nurse* OR "care aide*" OR "personal support worker*" OR "medical staff*" OR "health care worker*" OR "healthcare worker*" OR "health care" OR "health employee*" OR "health* staff" OR "home care" OR "home health*" OR "nursing home" ) OR AB ( caregiver* OR carer* OR "care giver*" OR nurse* OR "care aide*" OR "personal support worker*" OR "medical staff*" OR "health care worker*" OR "healthcare worker*" OR "health care" OR "health employee*" OR "health* staff" OR "home care" OR "home health*" OR "nursing home" ) |
| S8  | (MH "Health Personnel+")                                                                                                                                                                                                                                                                                                                                                                                                                                                                                                                                                         |
| S7  | (MH "Caregivers")                                                                                                                                                                                                                                                                                                                                                                                                                                                                                                                                                                |
| S6  | S4 OR S5                                                                                                                                                                                                                                                                                                                                                                                                                                                                                                                                                                         |
| S5  | AB ( dementia* OR alzheimer* OR "cognit* impair*" OR memor* N2 los* ) OR TI ( dementia* OR alzheimer* OR "cognit* impair*" OR memor* N2 los* )                                                                                                                                                                                                                                                                                                                                                                                                                                   |
| S4  | (MH "Dementia+")                                                                                                                                                                                                                                                                                                                                                                                                                                                                                                                                                                 |
| S3  | S1 OR S2                                                                                                                                                                                                                                                                                                                                                                                                                                                                                                                                                                         |
| S2  | AB ( "virtual realit*" OR vr ) OR TI ( "virtual realit*" OR vr )                                                                                                                                                                                                                                                                                                                                                                                                                                                                                                                 |
| S1  | (MH "Virtual Reality+")                                                                                                                                                                                                                                                                                                                                                                                                                                                                                                                                                          |

## MEDLINE database

|     |                                                                                                                                                                                                                                                                                                                                                                                                                                                                                                                                                                                  |
|-----|----------------------------------------------------------------------------------------------------------------------------------------------------------------------------------------------------------------------------------------------------------------------------------------------------------------------------------------------------------------------------------------------------------------------------------------------------------------------------------------------------------------------------------------------------------------------------------|
| S18 | S3 AND S6 AND S13 AND S17                                                                                                                                                                                                                                                                                                                                                                                                                                                                                                                                                        |
| S17 | S14 OR S15 OR S16                                                                                                                                                                                                                                                                                                                                                                                                                                                                                                                                                                |
| S16 | AB ( caregiver* OR carer* OR "care giver*" OR nurse* OR "care aide*" OR "personal support worker*" OR "medical staff*" OR "health care worker*" OR "healthcare worker*" OR "health care" OR "health employee*" OR "health* staff" OR "home care" OR "home health*" OR "nursing home" ) OR TI ( caregiver* OR carer* OR "care giver*" OR nurse* OR "care aide*" OR "personal support worker*" OR "medical staff*" OR "health care worker*" OR "healthcare worker*" OR "health care" OR "health employee*" OR "health* staff" OR "home care" OR "home health*" OR "nursing home" ) |
| S15 | (MH "Health Personnel+")                                                                                                                                                                                                                                                                                                                                                                                                                                                                                                                                                         |
| S14 | (MH "Caregiver Burden")                                                                                                                                                                                                                                                                                                                                                                                                                                                                                                                                                          |
| S13 | S7 OR S8 OR S9 OR S10 OR S11 OR S12                                                                                                                                                                                                                                                                                                                                                                                                                                                                                                                                              |
| S12 | AB ( Program* OR curricul* OR course* OR educat* OR train* OR teach* OR pedagog* OR learn* OR phenomenograph* OR evaluat* OR haptic* OR touch ) OR TI ( Program* OR curricul* OR course* OR educat* OR train* OR teach* OR pedagog* OR learn* OR phenomenograph* OR evaluat* OR haptic* OR touch )                                                                                                                                                                                                                                                                               |
| S11 | (MH "Learning+")                                                                                                                                                                                                                                                                                                                                                                                                                                                                                                                                                                 |
| S10 | (MH "Education+")                                                                                                                                                                                                                                                                                                                                                                                                                                                                                                                                                                |
| S9  | (MH "Program Evaluation+")                                                                                                                                                                                                                                                                                                                                                                                                                                                                                                                                                       |
| S8  | (MH "Program Development")                                                                                                                                                                                                                                                                                                                                                                                                                                                                                                                                                       |
| S7  | (MH "Nursing Research+")                                                                                                                                                                                                                                                                                                                                                                                                                                                                                                                                                         |
| S6  | S4 OR S5                                                                                                                                                                                                                                                                                                                                                                                                                                                                                                                                                                         |
| S5  | AB ( dementia* OR alzheimer* OR "cognit* impair*" OR memor* N2 los* ) OR TI ( dementia* OR alzheimer* OR "cognit* impair*" OR memor* N2 los* )                                                                                                                                                                                                                                                                                                                                                                                                                                   |
| S4  | (MH "Dementia+")                                                                                                                                                                                                                                                                                                                                                                                                                                                                                                                                                                 |
| S3  | S1 OR S2                                                                                                                                                                                                                                                                                                                                                                                                                                                                                                                                                                         |
| S2  | AB ( "virtual realit*" OR vr ) OR TI ( "virtual realit*" OR vr )                                                                                                                                                                                                                                                                                                                                                                                                                                                                                                                 |
| S1  | (MH "Virtual Reality+")                                                                                                                                                                                                                                                                                                                                                                                                                                                                                                                                                          |

## EMBASE database

|    |                                                                                                                                                                                                                                                                                                                                                                                                                                                                   |
|----|-------------------------------------------------------------------------------------------------------------------------------------------------------------------------------------------------------------------------------------------------------------------------------------------------------------------------------------------------------------------------------------------------------------------------------------------------------------------|
| 1  | (dementia or alzheimer* or cognit* impair* or (memor* adj2 los*)).mp. [mp=title, abstract, heading word, drug trade name, original title, device manufacturer, drug manufacturer, device trade name, keyword heading word, floating subheading word, candidate term word]                                                                                                                                                                                         |
| 2  | exp dementia/                                                                                                                                                                                                                                                                                                                                                                                                                                                     |
| 3  | 1 or 2                                                                                                                                                                                                                                                                                                                                                                                                                                                            |
| 4  | exp virtual reality/ or exp virtual reality head mounted display/                                                                                                                                                                                                                                                                                                                                                                                                 |
| 5  | (virtual realit* or vr).mp. [mp=title, abstract, heading word, drug trade name, original title, device manufacturer, drug manufacturer, device trade name, keyword heading word, floating subheading word, candidate term word]                                                                                                                                                                                                                                   |
| 6  | 4 or 5                                                                                                                                                                                                                                                                                                                                                                                                                                                            |
| 7  | exp education/                                                                                                                                                                                                                                                                                                                                                                                                                                                    |
| 8  | exp program development/ or exp program effectiveness/ or exp program efficacy/ or exp program evaluation/                                                                                                                                                                                                                                                                                                                                                        |
| 9  | exp course evaluation/ or exp health care quality/ or exp nursing education/                                                                                                                                                                                                                                                                                                                                                                                      |
| 10 | exp learning/                                                                                                                                                                                                                                                                                                                                                                                                                                                     |
| 11 | (Program* or curricul* or course* or educat* or train* or teach* or pedagog* or learn* or phenomenograph* or lesson* or evaluat* or haptic* or touch).mp. [mp=title, abstract, heading word, drug trade name, original title, device manufacturer, drug manufacturer, device trade name, keyword heading word, floating subheading word, candidate term word]                                                                                                     |
| 12 | 7 or 8 or 9 or 10 or 11                                                                                                                                                                                                                                                                                                                                                                                                                                           |
| 13 | exp caregiver burden/ or exp caregiver burnout/ or exp caregiver/                                                                                                                                                                                                                                                                                                                                                                                                 |
| 14 | exp health care personnel/                                                                                                                                                                                                                                                                                                                                                                                                                                        |
| 15 | (caregiver* or carer* or care giver* or nurse* or care aide* or personal support worker* or medical staff* or health care worker* or healthcare worker* or health care or health employee* or health* staff or home care or home health* or nursing home).mp. [mp=title, abstract, heading word, drug trade name, original title, device manufacturer, drug manufacturer, device trade name, keyword heading word, floating subheading word, candidate term word] |
| 16 | 13 or 14 or 15                                                                                                                                                                                                                                                                                                                                                                                                                                                    |
| 17 | 3 and 6 and 12 and 16                                                                                                                                                                                                                                                                                                                                                                                                                                             |

## Scopus database

TITLE-ABS-KEY ( ( program\* OR curricul\* OR course\* OR educat\* OR train\* OR teach\* OR pedagog\* OR learn\* ) AND {virtual reality} AND ( dementia\* OR alzheimer\* OR {cognitive impairment} OR {memory loss} ) AND ( care\* OR health\* ) )

## Web of Science

("virtual realit\*" OR vr ) AND (dementia\* OR alzheimer\* OR "cognit\* impair\*" OR memor\* N2 los\* ) AND (Program\* OR curricul\* OR course\* OR educat\* OR train\* OR teach\* OR pedagog\* OR learn\* OR phenomenograph\* OR evaluat\* OR haptic\* OR touch) AND (caregiver\* OR carer\* OR "care giver\*" OR nurse\* OR "care aide\*" OR "personal support worker\*" OR "medical staff\*" OR "health care worker\*" OR "healthcare worker\*" OR "health care" OR "health employee\*" OR "health\* staff" OR "home care" OR "home health\*" OR "nursing home")

## ProQuest database

noft("virtual realit\*" OR vr ) AND noft(dementia\* OR alzheimer\* OR "cognit\* impair\*" OR memor\* N2 los\* ) AND noft(Program\* OR curricul\* OR course\* OR educat\* OR train\* OR teach\* OR pedagog\* OR learn\* OR phenomenograph\* OR evaluat\* OR haptic\* OR touch ) AND noft(caregiver\* OR carer\* OR "care giver\*" OR nurse\* OR "care aide\*" OR "personal support worker\*" OR "medical staff\*" OR "health care worker\*" OR "healthcare worker\*" OR "health care" OR "health employee\*" OR "health\* staff" OR "home care" OR "home health\*" OR "nursing home" )

**Appendix II: Data extraction instrument**

---

| <b>Articles</b><br>(countries) | <b>Participants</b><br>(Sample size) | <b>Study Designs</b> | <b>Barriers</b> | <b>Facilitators</b> | <b>Impacts</b> | <b>Findings</b> |
|--------------------------------|--------------------------------------|----------------------|-----------------|---------------------|----------------|-----------------|
| Author, year                   |                                      |                      |                 |                     |                |                 |
| Author, year                   |                                      |                      |                 |                     |                |                 |
| Author, year                   |                                      |                      |                 |                     |                |                 |
| Author, year                   |                                      |                      |                 |                     |                |                 |
| Author, year                   |                                      |                      |                 |                     |                |                 |
| .....                          |                                      |                      |                 |                     |                |                 |

---
